# Supplementary material for: Association of circulating branched-chain amino acids with risk of pre-diabetes: a systematic review and meta-analysis
Source: PeerJ. 2025 Sep 25;13:e20054. doi: 10.7717/peerj.20054 (PMC12476861; doi:10.7717/peerj.20054)
Supplement: Supplemental Information 13 [file peerj-13-20054-s013.xlsx]

## Sheet: Basic Information
Author-year	Study design	Population	Population	No. of patients		Gender (M/F)		Age		Biological Sample	Detection method	Risk factors*
				Case	Control	Case	Control	Case	Control
Xu-2013	Case-control study	Singaporean	Asia	24	60	73%M	50%M	52.0(10.7)	38.1(7.8)	Serum	gas chromatography/massspectrometryandliquid chromatography/ massspectrometry	①②③
Owei-2019	Nested case-control study	African Americans and European Americans	Norh America	70	70	Not reported	Not reported	48.5(8.23)	47.6(9.16)	Plasma	injection tandem mass spectrometry	①④
Li-2021	Case-control study	Chinese	Asia	32	54	78.13%M	70.37%M	41.69(11.70)	54.22(13.33)	Serum	MS/MS	①②
Lee-2018	Case-control study	South Korean	Asia	69	73	43.5%M	37.0%M	57（48-63）	32（24-50）	Serum	high performance liquid chromatography-tandem mass spectrometry	①②③
Hu-2022	Cross-sectional study	Chinese	Asia	334	380	36.2%M	32.4%M	59.38（5.79）	57.56（5.79）	Serum	hydrophilic interaction chromatography-tandem mass spectrometric method	①②③
Connelly-2017	Case-control study	Netherlander	Europe	25	30	44%M	36.7%M	56(9)	52(9)	Plasma	Nuclear magnetic resonance	⑤
Andersson-Hall-2018	6-years follow-up study	Swede	Europe	46	139	100%F	100%F	35（6）	34（5）	Serum	NMR Spectroscopy	①②③
Shi-2021	Case-control study	Chinese	Asia	60	60	40%M	45%M	57.7（4.2）	56.4（4.4）	Serum	UHPLC system coupled to a triple quadrupole mass spectrometer	①②③
Mook-2016	Cohort study	Netherlander	Europe	186	174	63.4%M	48.3%M	58.0 (46.0-65.0)	55.5 (46.0-65.0)	Plasma	Biocrates AbsoluteIDQ™ p150 kit	①④
Menge-2010	Case-control study	German	Europe	17	14	29.4%M	50%M	60.1（8.9）	57.0（6.3）	Plasma	HPLC using an Eppendorf Biotronic LC 3000 Amino Acid Analyzer	①②③
Cobb-2015	Cohort study	Europeans from 13 countries involved	Europe	112	843	44%M	46%M	50（8）	47（8）	Plasma	UHPLC-MS-MS	①②③
Kujala-2016	Case-control study	Finns	Europe	252	214	Not reported	Not reported	72.7（5.9）	71.6（6.1）	Serum	NMR metabolomics platform	①②③
Gaike-2020	Case-control study	Western region of India	Asia	17	35	35.3%M	48.6%M	46（9.6）	37（7.6）	Plasma	HPLC coupled with solvent delivery systems, autosampler, and photodiode array detector (all from Agilent 1100 series, Agilent Technology, Germany).	①②③
Mels-2013	Cross-sectional study	From the Kenneth Kaunda Education district in the North-West Province of South Africa	Africa	178	225	61.2%M	40.9%M	46.7(8.50)	43.0(10.1)	Serum	electrospray ionisation tandem mass spectrometry	①④
Tulipani-2016	Case-control study	Spaniard	Europe	33	31	39.4%M	19.4%M	47.0（12.03）	45.7（13.58）	Serum	TSQVantage™ triple quadrupole mass spectrometer,LC-MS/MS, ESI-MS/MS	①②③
Safari-Alighiarloo-2024	Case-control study	Iranians	Asia	23	24	65.2%F	79.2F	50.90(10.30)	42(9.80)	Plasma	liquid chromatography coupled with tandem mass spectrometry	①②③
Abbreviations:M,male;F,female;Val,valine;Leu,leucine,Ile,isoleucine;Xleucine,Xleu,xLeucine represents the sum of Leucine and Isoleucine;BCAA，branched-chain amino acids Note：① Val; ② Leu; ③ Ile; ④Xleu;⑤BCAA；Data are means (SD) or number (%), as appropriate for variable.

## Sheet: Raw data
Valine
	Case			Control
study	Mean	SD	n	Mean	SD	n	Subgroup
Andersson-Hall-2018	108.2	15.1	46	100	19.2	139	Serum	Data is expressed as % of NGT.
Cobb-2015	24.8	4.148	112	23.8	4.296	843	Plasma	mg/L
Gaike-2020	2.73	0.64	17	3.039	0.67	35	Plasma	μg/0.1ml
Hu-2022	31.48	5.81	334	30.75	12.12	380	Serum	μg/mL
Kujala-2016	185	29	252	179	29	214	Serum	μmol/L
Lee-2018	297.8	35.63	69	250.9	58.37	73	Serum	μmol/L
Li-2021	99.02	25.21	32	108.13	26.37	54	Serum	nmol/mL
Mels-2013	127	77.26	178	103	68.44	225	Serum	log mg/l	该数据为队列研究中的一个横断面研究
Menge-2010	252.6	43.54	17	226.1	51.26	14	Plasma	μmol/L
Mook-2016	171.8	66.67	186	174.7	73.19	174	Plasma	μmol/L
Owei-2019	218	34.7	70	208	41.8	70	Plasma	The units is in μM
Shi-2021	241.5	53.3	60	219.6	51.6	60	Serum	μmol/L
Xu-2013	3.46	0.62	24	2.72	0.78	60	Serum	The units is in Arbitrary units (A.U),
Tulipani-2016	143.544	37.335	29	125.428	49.4579	29	Serum	nm
Safari-Alighiarloo-2024	192.95	38.42	23	168.02	34.35	24	Plasma
Leucine
	Case			Control
study	Mean	SD	n	Mean	SD	n	Subgroup
Andersson-Hall-2018	111.2	13.6	46	100	18.2	139	Serum	Data is expressed as % of NGT.
Cobb-2015	14.4	2.13	112	13.8	2.4	843	Plasma	mg/L
Gaike-2020	1.6	0.44	17	1.8	0.51	35	Plasma	μg/0.1ml
Hu-2022	26.64	5.43	334	25.57	5.13	380	Serum
Kujala-2016	80	14	252	78	12	214	Serum	μmol/L
Lee-2018	154.4	27.63	69	129.7	34.89	73	Serum	μmol/L
Li-2021	94.34	31.32	32	95.9	26.36	54	Serum	nmol/mL
Menge-2010	121.1	22.68	17	108.4	23.57	14	Plasma	μmol/L
Shi-2021	145.2	30.6	60	132.1	31.1	60	Serum	μmol/L
Xu-2013	1.67	0.41	24	1.34	0.44	60	Serum	The units is in Arbitrary units (A.U),
Tulipani-2016	110.128	25.7075	29	100.145	31.8455	29	Serum	nm
Safari-Alighiarloo-2024	119.33	21.96	23	107.3	21.43	24	Plasma
Isoleu
	Case			Control
study	Mean	SD	n	Mean	SD	n	Subgroup
Andersson-Hall-2018	109	19	46	100	22.1	139	Serum	Data is expressed as % of NGT.
Cobb-2015	7.1	1.33	112	6.9	1.33	843	Plasma	mg/L
Gaike-2020	1.052	0.25	17	1.18	0.284	35	Plasma	μg/0.1ml
Hu-2022	13.22	2.91	334	12.68	2.97	380	Serum	μg/mL
Kujala-2016	55	11	252	53	10	214	Serum	μmol/L
Lee-2018	79.3	16.67	69	67	22	73	Serum	μmol/L
Menge-2010	67.9	15.67	17	58.6	13.84	14	Plasma	μmol/L
Shi-2021	70.2	28.8	60	62.4	17.6	60	Serum	μmol/L
Xu-2013	1.03	0.24	24	0.89	0.25	60	Serum	The units is in Arbitrary units (A.U),
Tulipani-2016	47.9738	13.2429	29	42.8517	23.5817	29	Serum	nm
Safari-Alighiarloo-2024	22	11.56	23	17.6	15.4	24	Plasma
BCAA
	Case			Control
study	Mean	SD	n	Mean	SD	n
Connelly-2017	398	73	25	397	92	30	Plasma	The units is in μM
Tulipani-2016	265.06	121.664	33	251.102	119.525	31	Serum
Isoleu+Leu
	Case			Control
study	Mean	SD	n	Mean	SD	n	Subgroup
Mels-2013	135	117.8	178	105	98.59	225	Serum	log mg/l
Mook-2016	206.3	93.93	186	184.4	82.3	174	Plasma	μmol/L
Owei-2019	154	24.3	70	145	29.9	70	Plasma	The units is in μM

## Sheet: Newcastle-Ottawa Scale 
Study	Selection				Comparability	Exposure			Score
	Adequate definition of cases	Representativeness of the cases	Selection of controls	Definition of controls		Ascertainment of exposure	Same method of ascertainment for cases and controls	Non-Response rate
Xu-2013	★	★	★	★	★☆	★	★	★	8
Owei-2019	★	★	★	★	★☆	★	★	★	8
Li-2021	★	★	★	☆	★☆	☆	★	★	6
Lee-2018	★	★	★	★	★☆	★	★	★	8
Hu-2022	★	★	☆	☆	★☆	★	★	★	6
Connelly-2017	★	★	★	★	★☆	★	★	★	8
Andersson-Hall-2018	★	☆	★	☆	★☆	★	★	★	6
Shi-2021	★	★	★	★	★☆	★	★	★	8
Mook-2016	★	★	☆	☆	★☆	★	★	★	6
Menge-2010	★	★	☆	★	★★	★	★	★	8
Kujala-2016	★	☆	★	★	★☆	★	★	★	7
Gaike-2020	★	☆	★	☆	★☆	☆	★	★	5
Tulipani-2016	★	★	★	★	★☆	★	★	☆	7
Safari-Alighiarloo-2024	★	★	★	☆	★☆	★	★	★	7
Cobb-2015	★	★	★	★	★☆	★	★	★	8
Mels-2013	☆	★	☆	☆	★☆	★	★	★	5
Note：Each study was assessed from three perspectives,including the selection of study groups, which provided a score of be­tween 0 and 4 points, comparability of groups (0–2 points), and ascer­tainment of outcome (0–3 points). Studies with more than six points were considered high quality.Studies with a score of more than 6 are considered to be of high quality. Studies with a score of 4-6 are of …
Note：Each study was assessed from three perspectives,including the selection of study groups, which provided a score of be­tween 0 and 4 points, comparability of groups (0–2 points), and ascer­tainment of outcome (0–3 points). Studies with more than six points were considered high quality.Studies with a score of more than 6 are considered to be of high quality. Studies with a score of 4-6 are of …
